# Supplementary material for: Birth-size reference charts for normal nursery newborns between 35 and 41 weeks
Source: Research Square preprint supplement (doi:10.21203/rs.3.rs-6551227/v1), 2025-05-06
Supplement: Supplementary file 1 [file 38b516fcdf8acbcd17a7fbb1.docx]

**Supplemental Table 1. Maternal and Neonatal Characteristics by Completed Gestational Week Group**

| **Completed Gestational Week Group** | **35** | **36** | **37** | **38** | **39** | **40** | **41** |
| --- | --- | --- | --- | --- | --- | --- | --- |
| **Number** | 1284 | 4364 | 17487 | 27073 | 53467 | 21316 | 4159 |
| **Male, n (%)** | 677 (52.7) | 2261 (51.8) | 8975 (51.3) | 13985 (51.7) | 27061 (50.6) | 10566 (49.6) | 2095 (50.4) |
| **Delivery type, n (%)** |  |  |  |  |  |  |  |
| C-Section | 559 (43.5) | 1603 (36.7) | 5450 (31.2) | 6571 (24.3) | 14852 (27.8) | 3808 (17.9) | 877 (21.1) |
| Vaginal | 476 (37.1) | 1702 (39.0) | 7809 (44.7) | 14189 (52.4) | 27014 (50.5) | 12762 (59.9) | 2229 (53.6) |
| Unknown | 249 (19.4) | 1059 (24.3) | 4228 (24.2) | 6313 (23.3) | 11601 (21.7) | 4746 (22.3) | 1053 (25.3) |
| **Maternal age, median [IQR]** | 30 [25, 34] | 30 [25, 34] | 29 [25, 34] | 29 [25, 33] | 29 [25, 33] | 28 [24, 32] | 29 [24, 32] |
| **Antenatal corticosteroids, n (%)** | 347 (27.0) | 506 (11.6) | 325 (1.9) | 102 (0.4) | 107 (0.2) | 33 (0.2) | 3 (0.1) |
| **Apgar1, median [IQR]** | 8 [8, 8] | 8 [8, 8] | 8 [8, 8] | 8 [8, 9] | 8 [8, 9] | 8 [8, 8] | 8 [8, 8] |
| **Apgar5, median [IQR]** | 9 [9, 9] | 9 [9, 9] | 9 [9, 9] | 9 [9, 9] | 9 [9, 9] | 9 [9, 9] | 9 [9, 9] |
| **Birth number, n (%)** |  |  |  |  |  |  |  |
| Single | 1067 (83.1) | 3827 (87.7) | 16723 (95.6) | 26781 (98.9) | 53446 (100.0) | 21308 (100.0) | 4158 (100.0) |
| Twin | 214 (16.7) | 537 (12.3) | 764 (4.4) | 292 (1.1) | 20 (0.0) | 8 (0.0) | 1 (0.0) |
| Triplet | 3 (0.2) | 0 (0.0) | 0 (0.0) | 0 (0.0) | 1 (0.0) | 0 (0.0) | 0 (0.0) |
| **Maternal race/ethnicity (%)** |  |  |  |  |  |  |  |
| White | 138 (10.7) | 388 (8.9) | 1582 (9.0) | 2373 (8.8) | 5783 (10.8) | 2351 (11.0) | 593 (14.3) |
| Black | 80 (6.2) | 194 (4.4) | 611 (3.5) | 879 (3.2) | 1629 (3.0) | 695 (3.3) | 141 (3.4) |
| Hispanic | 187 (14.6) | 390 (8.9) | 1506 (8.6) | 2328 (8.6) | 4683 (8.8) | 1749 (8.2) | 301 (7.2) |
| Asian | 19 (1.5) | 62 (1.4) | 186 (1.1) | 411 (1.5) | 797 (1.5) | 265 (1.2) | 38 (0.9) |
| Other | 59 (4.6) | 105 (2.4) | 407 (2.3) | 730 (2.7) | 1474 (2.8) | 572 (2.7) | 107 (2.6) |
| Unknown | 801 (62.4) | 3225 (73.9) | 13195 (75.5) | 20352 (75.2) | 39101 (73.1) | 15684 (73.6) | 2979 (71.6) |
| **Any maternal complication reported, n (%)** | 817 (63.6) | 2193 (50.3) | 7994 (45.7) | 11336 (41.9) | 20525 (38.4) | 7759 (36.4) | 1604 (38.6) |
| **Chorioamnionitis, n (%)** | 5 (0.4) | 12 (0.3) | 136 (0.8) | 275 (1.0) | 631 (1.2) | 440 (2.1) | 108 (2.6) |
| **Fetal growth restriction, n (%)** | 50 (3.9) | 168 (3.8) | 660 (3.8) | 631 (2.3) | 359 (0.7) | 67 (0.3) | 15 (0.4) |
| **Maternal diabetes mellitus during pregnancy, n (%)** | 194 (15.1) | 585 (13.4) | 2325 (13.3) | 3175 (11.7) | 3224 (6.0) | 519 (2.4) | 69 (1.7) |
| **Maternal obesity, n (%)** | 51 (4.0) | 117 (2.7) | 583 (3.3) | 696 (2.6) | 1267 (2.4) | 385 (1.8) | 82 (2.0) |
| **Pre-eclampsia, n (%)** | 103 (8.0) | 213 (4.9) | 636 (3.6) | 386 (1.4) | 277 (0.5) | 102 (0.5) | 22 (0.5) |
| **Maternal smoking, n (%)** | 9 (0.7) | 20 (0.5) | 80 (0.5) | 110 (0.4) | 184 (0.3) | 62 (0.3) | 13 (0.3) |
| **Congenital infection exposure, n (%)** | 7 (0.5) | 26 (0.6) | 100 (0.6) | 184 (0.7) | 339 (0.6) | 122 (0.6) | 22 (0.5) |
| **Minor anomaly, n (%)** | 24 (1.9) | 94 (2.2) | 368 (2.1) | 545 (2.0) | 989 (1.8) | 346 (1.6) | 61 (1.5) |
| **Major anomaly, n (%)** | 19 (1.5) | 49 (1.1) | 198 (1.1) | 243 (0.9) | 439 (0.8) | 160 (0.8) | 22 (0.5) |
| **Maternal Group B Streptococcus, n (%)** | 67 (5.2) | 268 (6.1) | 1362 (7.8) | 2367 (8.7) | 4328 (8.1) | 1857 (8.7) | 355 (8.5) |
| **Maternal syphilis, n (%)** | 2 (0.2) | 5 (0.1) | 36 (0.2) | 66 (0.2) | 113 (0.2) | 42 (0.2) | 5 (0.1) |
| **Birth weight (gram), median [IQR]** | 2570 [2330, 2800] | 2770 [2520, 3030] | 3000 [2739, 3280] | 3190 [2940, 3470] | 3370 [3115, 3630] | 3460 [3210, 3730] | 3580 [3320, 3860] |
| **Birth length (m), median [IQR]** | 47.0 [45.7, 48.5] | 48.3 [47.0, 49.5] | 49.5 [48.0, 50.8] | 50.2 [48.8, 51.5] | 50.8 [49.5, 52.1] | 51.4 [50.1, 53.0] | 52.0 [50.8, 53.3] |
| **Birth head circumference (cm), median [IQR]** | 32.5 [31.5, 33.5] | 33.0 [32.0, 34.0] | 33.5 [32.5, 34.5] | 34.0 [33.0, 35.0] | 34.5 [33.5, 35.5] | 34.5 [33.5, 35.5] | 35.0 [34.0, 36.0] |
| **Birth body mass index, median [IQR]** | 11.5 [10.8, 12.4] | 11.9 [11.1, 12.7] | 12.3 [11.5, 13.2] | 12.7 [11.9, 13.5] | 13.1 [12.3, 13.9] | 13.1 [12.3, 14.0] | 13.3 [12.5, 14.2] |
| IQR: interquartile range | | | | | | | |
