# Supplementary material for: Birth-size reference charts for normal nursery newborns between 35 and 41 weeks
Source: Research Square preprint supplement (doi:10.21203/rs.3.rs-6551227/v1), 2025-05-06
Supplement: Supplementary file 1 [file 87e1759daee5730e70d0de11.pdf]

# 2025 Birth-Size Reference Charts for Normal Nursery Male Newborns

Name: \_\_\_\_\_

Record #: \_\_\_\_\_

Birth-Size Reference Charts by Gestational Day for Male Newborns Admitted to Nurseries, 2021–2024

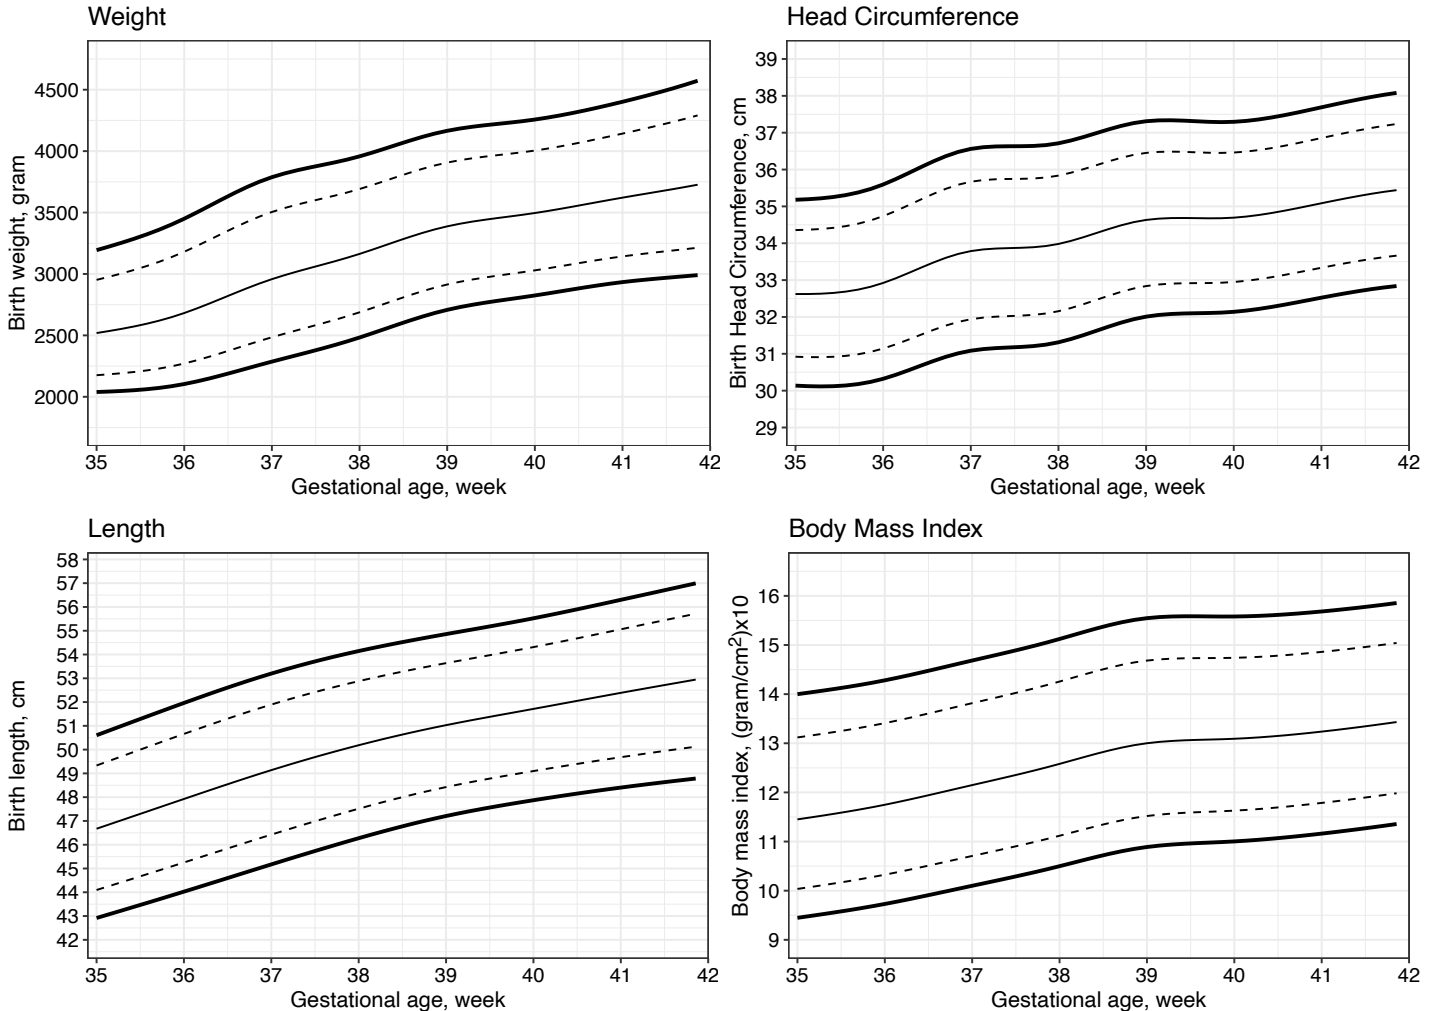

From bottom to top, the 3<sup>rd</sup>, 10<sup>th</sup>, 50<sup>th</sup>, 90<sup>th</sup>, and 97<sup>th</sup> percentile curves are presented.

## BIRTH SIZE ASSESSMENT

|                                                                                      |                      |                                  |                                                 |            |
|--------------------------------------------------------------------------------------|----------------------|----------------------------------|-------------------------------------------------|------------|
| Date of Birth:     /     /     (   W   D   GA )                                      |                      |                                  |                                                 | Select One |
| Weight:<br><i>grams</i>                                                              | Length:<br><i>cm</i> | Head Circumference:<br><i>cm</i> | BMI:<br>$\left(\frac{g}{cm^2}\right) \times 10$ |            |
| Large for gestational age (LGA, > 90 <sup>th</sup> percentile)                       |                      |                                  |                                                 | [   ]      |
| Appropriate for gestational age (AGA, 10 <sup>th</sup> -90 <sup>th</sup> percentile) |                      |                                  |                                                 | [   ]      |
| Small for gestational age (SGA, < 10 <sup>th</sup> percentile)                       |                      |                                  |                                                 | [   ]      |

# 2025 Birth-Size Reference Charts for Normal Nursery Female Newborns

Name: \_\_\_\_\_

Record #: \_\_\_\_\_

Birth-Size Reference Charts by Gestational Day for Female Newborns Admitted to Nurseries, 2021–2024

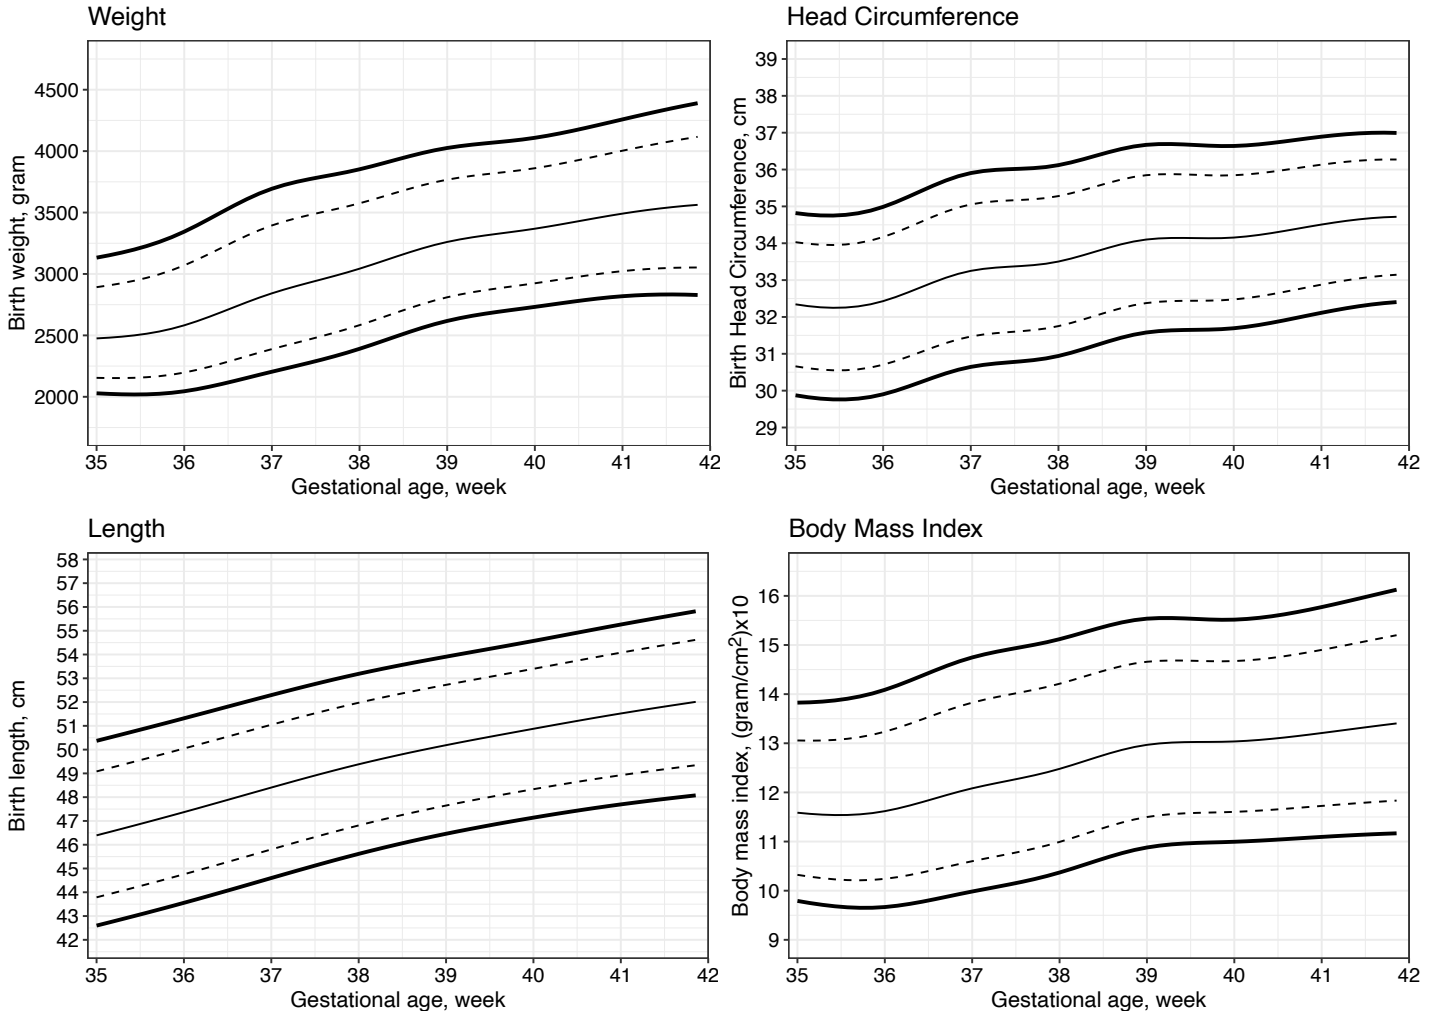

From bottom to top, the 3<sup>rd</sup>, 10<sup>th</sup>, 50<sup>th</sup>, 90<sup>th</sup>, and 97<sup>th</sup> percentile curves are presented.

## BIRTH SIZE ASSESSMENT

|                                                                                      |                      |                                  |                                                 |            |
|--------------------------------------------------------------------------------------|----------------------|----------------------------------|-------------------------------------------------|------------|
| Date of Birth:     /     /     (     W     D     GA )                                |                      |                                  |                                                 | Select One |
| Weight:<br><i>grams</i>                                                              | Length:<br><i>cm</i> | Head Circumference:<br><i>cm</i> | BMI:<br>$\left(\frac{g}{cm^2}\right) \times 10$ |            |
| Large for gestational age (LGA, > 90 <sup>th</sup> percentile)                       |                      |                                  |                                                 | [   ]      |
| Appropriate for gestational age (AGA, 10 <sup>th</sup> -90 <sup>th</sup> percentile) |                      |                                  |                                                 | [   ]      |
| Small for gestational age (SGA, < 10 <sup>th</sup> percentile)                       |                      |                                  |                                                 | [   ]      |
