# Supplementary material for: Birth-size reference charts for normal nursery newborns between 35 and 41 weeks
Source: Research Square preprint supplement (doi:10.21203/rs.3.rs-6551227/v1), 2025-05-06
Supplement: Supplementary file 2 [file eed9c56c8b1f42eb929f16c8.docx]

**Supplemental Table 2. Weight LMS Table for Females**

| GA in days | M | S | L | percentile=3 | percentile=10 | percentile=50 | percentile=90 | percentile=97 |
| --- | --- | --- | --- | --- | --- | --- | --- | --- |
| 245 | 2475.481 | 0.114479 | -0.7721 | 2028.416 | 2154.276 | 2475.481 | 2892.557 | 3132.752 |
| 246 | 2481.425 | 0.116817 | -0.72176 | 2023.639 | 2152.596 | 2481.425 | 2907.409 | 3152.054 |
| 247 | 2489.301 | 0.119166 | -0.67153 | 2020.248 | 2152.475 | 2489.301 | 2924.521 | 3173.721 |
| 248 | 2499.804 | 0.121507 | -0.6215 | 2018.838 | 2154.538 | 2499.804 | 2944.648 | 3198.534 |
| 249 | 2513.624 | 0.123813 | -0.57175 | 2020.024 | 2159.426 | 2513.624 | 2968.519 | 3227.23 |
| 250 | 2531.455 | 0.126062 | -0.52235 | 2024.392 | 2167.761 | 2531.455 | 2996.89 | 3260.595 |
| 251 | 2553.988 | 0.128225 | -0.47337 | 2032.551 | 2180.179 | 2553.988 | 3030.496 | 3299.374 |
| 252 | 2581.876 | 0.130274 | -0.42491 | 2045.068 | 2197.278 | 2581.876 | 3070.028 | 3344.275 |
| 253 | 2614.803 | 0.132168 | -0.37709 | 2061.797 | 2218.87 | 2614.803 | 3114.971 | 3394.659 |
| 254 | 2651.442 | 0.133854 | -0.33013 | 2081.872 | 2243.964 | 2651.442 | 3163.545 | 3448.486 |
| 255 | 2690.423 | 0.135277 | -0.28423 | 2104.439 | 2271.567 | 2690.423 | 3213.883 | 3503.615 |
| 256 | 2730.375 | 0.136379 | -0.2396 | 2128.699 | 2300.721 | 2730.375 | 3264.088 | 3557.863 |
| 257 | 2769.924 | 0.137106 | -0.19645 | 2153.88 | 2330.484 | 2769.924 | 3312.266 | 3609.065 |
| 258 | 2807.702 | 0.137403 | -0.15498 | 2179.249 | 2359.942 | 2807.702 | 3356.513 | 3655.052 |
| 259 | 2842.38 | 0.137223 | -0.11541 | 2204.107 | 2388.21 | 2842.38 | 3395.018 | 3693.784 |
| 260 | 2873.726 | 0.136574 | -0.0779 | 2228.387 | 2415.159 | 2873.726 | 3427.531 | 3725.055 |
| 261 | 2902.622 | 0.135526 | -0.0426 | 2252.615 | 2441.397 | 2902.622 | 3455.419 | 3750.559 |
| 262 | 2930.002 | 0.134149 | -0.00966 | 2277.329 | 2467.552 | 2930.002 | 3480.113 | 3772.046 |
| 263 | 2956.799 | 0.132516 | 0.020795 | 2303.026 | 2494.231 | 2956.799 | 3503.051 | 3791.262 |
| 264 | 2983.947 | 0.1307 | 0.04861 | 2330.183 | 2522.026 | 2983.947 | 3525.66 | 3809.925 |
| 265 | 3012.38 | 0.128767 | 0.073648 | 2359.289 | 2551.542 | 3012.38 | 3549.324 | 3829.675 |
| 266 | 3042.99 | 0.126784 | 0.095776 | 2390.783 | 2583.339 | 3042.99 | 3575.373 | 3852.079 |
| 267 | 3075.737 | 0.124797 | 0.1151 | 2424.434 | 2617.24 | 3075.737 | 3603.927 | 3877.332 |
| 268 | 3109.638 | 0.122836 | 0.13196 | 2459.313 | 2652.301 | 3109.638 | 3633.928 | 3904.32 |
| 269 | 3143.669 | 0.12093 | 0.146709 | 2494.441 | 2687.532 | 3143.669 | 3664.284 | 3931.899 |
| 270 | 3176.806 | 0.119104 | 0.159699 | 2528.841 | 2721.946 | 3176.806 | 3693.903 | 3958.925 |
| 271 | 3208.026 | 0.117382 | 0.171281 | 2561.523 | 2754.546 | 3208.026 | 3721.703 | 3984.274 |
| 272 | 3236.304 | 0.115789 | 0.181808 | 2591.477 | 2784.32 | 3236.304 | 3746.623 | 4006.854 |
| 273 | 3260.656 | 0.114344 | 0.191628 | 2617.747 | 2810.308 | 3260.656 | 3767.631 | 4025.595 |
| 274 | 3281.021 | 0.113056 | 0.201029 | 2640.165 | 2832.375 | 3281.021 | 3784.72 | 4040.509 |
| 275 | 3298.249 | 0.11192 | 0.210234 | 2659.381 | 2851.239 | 3298.249 | 3798.867 | 4052.628 |
| 276 | 3313.23 | 0.110931 | 0.219465 | 2676.092 | 2867.655 | 3313.23 | 3811.087 | 4063.018 |
| 277 | 3326.853 | 0.110086 | 0.228944 | 2690.991 | 2882.383 | 3326.853 | 3822.395 | 4072.75 |
| 278 | 3340.01 | 0.109379 | 0.238892 | 2704.798 | 2896.196 | 3340.01 | 3833.785 | 4082.86 |
| 279 | 3353.589 | 0.108809 | 0.249531 | 2718.21 | 2909.854 | 3353.589 | 3846.271 | 4094.417 |
| 280 | 3368.452 | 0.108372 | 0.261075 | 2731.919 | 2924.105 | 3368.452 | 3860.818 | 4108.428 |
| 281 | 3384.822 | 0.108072 | 0.273561 | 2746.069 | 2939.118 | 3384.822 | 3877.699 | 4125.192 |
| 282 | 3402.297 | 0.107912 | 0.286859 | 2760.309 | 2954.526 | 3402.297 | 3896.477 | 4144.253 |
| 283 | 3420.449 | 0.107899 | 0.300828 | 2774.241 | 2969.921 | 3420.449 | 3916.707 | 4165.158 |
| 284 | 3438.85 | 0.10804 | 0.315329 | 2787.469 | 2984.896 | 3438.85 | 3937.944 | 4187.456 |
| 285 | 3457.073 | 0.108343 | 0.330224 | 2799.586 | 2999.037 | 3457.073 | 3959.748 | 4210.705 |
| 286 | 3474.69 | 0.108815 | 0.345371 | 2810.194 | 3011.936 | 3474.69 | 3981.677 | 4234.454 |
| 287 | 3491.281 | 0.109465 | 0.360635 | 2818.892 | 3023.184 | 3491.281 | 4003.306 | 4258.279 |
| 288 | 3506.615 | 0.11029 | 0.375944 | 2825.495 | 3032.584 | 3506.615 | 4024.361 | 4281.884 |
| 289 | 3520.639 | 0.111273 | 0.391289 | 2830.047 | 3040.152 | 3520.639 | 4044.703 | 4305.081 |
| 290 | 3533.311 | 0.112399 | 0.406661 | 2832.592 | 3045.908 | 3533.311 | 4064.21 | 4327.704 |
| 291 | 3544.585 | 0.11365 | 0.422053 | 2833.194 | 3049.885 | 3544.585 | 4082.739 | 4349.56 |
| 292 | 3554.417 | 0.115011 | 0.437459 | 2831.904 | 3052.107 | 3554.417 | 4100.163 | 4370.474 |
| 293 | 3562.763 | 0.116463 | 0.45287 | 2828.8 | 3052.618 | 3562.763 | 4116.33 | 4390.24 |

**Supplemental Table 3. Weight LMS Table for Males**

| GA in days | M | S | L | percentile=3 | percentile=10 | percentile=50 | percentile=90 | percentile=97 |
| --- | --- | --- | --- | --- | --- | --- | --- | --- |
| 245 | 2519.118 | 0.118778 | -0.51602 | 2039.035 | 2175.745 | 2519.118 | 2951.873 | 3193.973 |
| 246 | 2535.516 | 0.120802 | -0.46164 | 2042.83 | 2183.36 | 2535.516 | 2977.315 | 3223.349 |
| 247 | 2553.19 | 0.122798 | -0.40757 | 2047.499 | 2191.996 | 2553.19 | 3004.134 | 3254.068 |
| 248 | 2572.749 | 0.12474 | -0.35397 | 2053.609 | 2202.237 | 2572.749 | 3032.953 | 3286.759 |
| 249 | 2594.8 | 0.126601 | -0.30099 | 2061.729 | 2214.665 | 2594.8 | 3064.397 | 3322.054 |
| 250 | 2619.952 | 0.128353 | -0.2488 | 2072.431 | 2229.867 | 2619.952 | 3099.087 | 3360.585 |
| 251 | 2648.813 | 0.129968 | -0.19754 | 2086.289 | 2248.43 | 2648.813 | 3137.649 | 3402.986 |
| 252 | 2681.955 | 0.131414 | -0.14739 | 2103.871 | 2270.928 | 2681.955 | 3180.649 | 3449.823 |
| 253 | 2719.087 | 0.13266 | -0.09851 | 2125.075 | 2297.206 | 2719.087 | 3227.625 | 3500.549 |
| 254 | 2759.022 | 0.133673 | -0.05108 | 2149.135 | 2326.378 | 2759.022 | 3277.035 | 3553.439 |
| 255 | 2800.528 | 0.13442 | -0.00528 | 2175.286 | 2357.543 | 2800.528 | 3327.271 | 3606.699 |
| 256 | 2842.376 | 0.134869 | 0.038714 | 2202.793 | 2389.82 | 2842.376 | 3376.725 | 3658.538 |
| 257 | 2883.336 | 0.134989 | 0.080717 | 2230.942 | 2422.338 | 2883.336 | 3423.785 | 3707.167 |
| 258 | 2922.177 | 0.134751 | 0.12055 | 2259.035 | 2454.236 | 2922.177 | 3466.849 | 3750.815 |
| 259 | 2957.713 | 0.134133 | 0.158033 | 2286.388 | 2484.67 | 2957.713 | 3504.407 | 3787.832 |
| 260 | 2989.801 | 0.133157 | 0.192967 | 2312.923 | 2513.526 | 2989.801 | 3536.385 | 3818.22 |
| 261 | 3019.365 | 0.131893 | 0.225135 | 2339.149 | 2541.41 | 3019.365 | 3564.193 | 3843.682 |
| 262 | 3047.378 | 0.130412 | 0.25432 | 2365.571 | 2568.947 | 3047.378 | 3589.299 | 3865.973 |
| 263 | 3074.811 | 0.128786 | 0.280304 | 2392.666 | 2596.742 | 3074.811 | 3613.169 | 3886.833 |
| 264 | 3102.637 | 0.12708 | 0.302869 | 2420.922 | 2625.415 | 3102.637 | 3637.231 | 3907.933 |
| 265 | 3131.828 | 0.12536 | 0.321797 | 2450.804 | 2655.571 | 3131.828 | 3662.907 | 3930.933 |
| 266 | 3163.314 | 0.123686 | 0.336888 | 2482.76 | 2687.795 | 3163.314 | 3691.537 | 3957.381 |
| 267 | 3197.051 | 0.122088 | 0.348327 | 2516.584 | 2721.931 | 3197.051 | 3723.173 | 3987.363 |
| 268 | 3232.01 | 0.12057 | 0.356694 | 2551.392 | 2757.064 | 3232.01 | 3756.595 | 4019.537 |
| 269 | 3267.119 | 0.119134 | 0.362585 | 2586.266 | 2792.238 | 3267.119 | 3790.541 | 4052.516 |
| 270 | 3301.307 | 0.117782 | 0.366593 | 2620.28 | 2826.496 | 3301.307 | 3823.758 | 4084.937 |
| 271 | 3333.501 | 0.116516 | 0.369316 | 2652.502 | 2858.871 | 3333.501 | 3855.006 | 4115.453 |
| 272 | 3362.631 | 0.115338 | 0.371349 | 2681.992 | 2888.394 | 3362.631 | 3883.051 | 4142.734 |
| 273 | 3387.666 | 0.11425 | 0.373273 | 2707.843 | 2914.129 | 3387.666 | 3906.718 | 4165.511 |
| 274 | 3408.53 | 0.11325 | 0.375332 | 2729.952 | 2935.984 | 3408.53 | 3925.923 | 4183.695 |
| 275 | 3426.088 | 0.112331 | 0.377443 | 2749.028 | 2954.716 | 3426.088 | 3941.661 | 4198.341 |
| 276 | 3441.25 | 0.111489 | 0.379502 | 2765.808 | 2971.112 | 3441.25 | 3954.976 | 4210.566 |
| 277 | 3454.923 | 0.110718 | 0.381411 | 2781.046 | 2985.973 | 3454.923 | 3966.899 | 4221.463 |
| 278 | 3468.015 | 0.110013 | 0.383067 | 2795.497 | 3000.098 | 3468.015 | 3978.458 | 4232.121 |
| 279 | 3481.435 | 0.109368 | 0.384372 | 2809.927 | 3014.298 | 3481.435 | 3990.674 | 4243.618 |
| 280 | 3496.062 | 0.10878 | 0.385225 | 2825.066 | 3029.347 | 3496.062 | 4004.545 | 4257.013 |
| 281 | 3512.172 | 0.108257 | 0.385559 | 2841.093 | 3045.452 | 3512.172 | 4020.427 | 4272.703 |
| 282 | 3529.445 | 0.10782 | 0.385337 | 2857.628 | 3062.248 | 3529.445 | 4038.061 | 4290.463 |
| 283 | 3547.539 | 0.10749 | 0.384523 | 2874.265 | 3079.347 | 3547.539 | 4057.161 | 4310.041 |
| 284 | 3566.11 | 0.107287 | 0.383081 | 2890.602 | 3096.363 | 3566.11 | 4077.445 | 4331.185 |
| 285 | 3584.816 | 0.107234 | 0.380975 | 2906.217 | 3112.894 | 3584.816 | 4098.644 | 4353.669 |
| 286 | 3603.312 | 0.107351 | 0.378171 | 2920.702 | 3128.55 | 3603.312 | 4120.481 | 4377.254 |
| 287 | 3621.271 | 0.10766 | 0.374634 | 2933.648 | 3142.943 | 3621.271 | 4142.706 | 4401.734 |
| 288 | 3638.662 | 0.108161 | 0.370394 | 2945.02 | 3156.037 | 3638.662 | 4165.303 | 4427.102 |
| 289 | 3655.748 | 0.108829 | 0.365539 | 2955.163 | 3168.157 | 3655.748 | 4188.455 | 4453.499 |
| 290 | 3672.801 | 0.109642 | 0.360159 | 2964.42 | 3179.623 | 3672.801 | 4212.375 | 4481.107 |
| 291 | 3690.094 | 0.110574 | 0.354344 | 2973.155 | 3190.776 | 3690.094 | 4237.254 | 4510.071 |
| 292 | 3707.899 | 0.111602 | 0.348185 | 2981.718 | 3201.943 | 3707.899 | 4263.294 | 4540.558 |
| 293 | 3726.49 | 0.1127 | 0.341772 | 2990.472 | 3213.463 | 3726.49 | 4290.683 | 4572.71 |

**Supplemental Table 4. Length LMS Table for Females**

| GA in days | M | S | L | percentile=3 | percentile=10 | percentile=50 | percentile=90 | percentile=97 |
| --- | --- | --- | --- | --- | --- | --- | --- | --- |
| 245 | 46.3932 | 0.044531 | 0.443551 | 42.59786 | 43.78754 | 46.3932 | 49.08293 | 50.36963 |
| 246 | 46.5296 | 0.044404 | 0.463958 | 42.7305 | 43.92211 | 46.5296 | 49.21785 | 50.50266 |
| 247 | 46.6667 | 0.044275 | 0.484364 | 42.86402 | 44.05751 | 46.6667 | 49.35336 | 50.63624 |
| 248 | 46.8048 | 0.044142 | 0.504771 | 42.99888 | 44.19414 | 46.8048 | 49.48964 | 50.77049 |
| 249 | 46.9441 | 0.044005 | 0.525177 | 43.13525 | 44.33218 | 46.9441 | 49.62691 | 50.90563 |
| 250 | 47.0847 | 0.043863 | 0.545583 | 43.27334 | 44.4718 | 47.0847 | 49.76521 | 51.04169 |
| 251 | 47.2269 | 0.043714 | 0.56599 | 43.41358 | 44.61341 | 47.2269 | 49.90472 | 51.17878 |
| 252 | 47.3709 | 0.043558 | 0.586396 | 43.55617 | 44.7572 | 47.3709 | 50.04566 | 51.31714 |
| 253 | 47.5165 | 0.043394 | 0.606803 | 43.70103 | 44.90304 | 47.5165 | 50.18775 | 51.45644 |
| 254 | 47.6635 | 0.043221 | 0.627209 | 43.84806 | 45.05081 | 47.6635 | 50.33071 | 51.59637 |
| 255 | 47.8114 | 0.043042 | 0.647616 | 43.99657 | 45.19987 | 47.8114 | 50.4742 | 51.73666 |
| 256 | 47.9598 | 0.042856 | 0.668022 | 44.14628 | 45.34991 | 47.9598 | 50.61772 | 51.87678 |
| 257 | 48.1085 | 0.042664 | 0.688428 | 44.29692 | 45.50068 | 48.1085 | 50.76114 | 52.01661 |
| 258 | 48.257 | 0.042466 | 0.708835 | 44.44805 | 45.65171 | 48.257 | 50.90391 | 52.1556 |
| 259 | 48.405 | 0.042262 | 0.729241 | 44.59939 | 45.80272 | 48.405 | 51.04573 | 52.29344 |
| 260 | 48.5519 | 0.042054 | 0.749648 | 44.75023 | 45.95304 | 48.5519 | 51.18607 | 52.42964 |
| 261 | 48.6973 | 0.041843 | 0.770054 | 44.9001 | 46.10222 | 48.6973 | 51.32459 | 52.56388 |
| 262 | 48.8407 | 0.041629 | 0.79046 | 45.04855 | 46.24978 | 48.8407 | 51.46075 | 52.69562 |
| 263 | 48.9815 | 0.041413 | 0.810867 | 45.19493 | 46.3951 | 48.9815 | 51.594 | 52.82429 |
| 264 | 49.1192 | 0.041197 | 0.831273 | 45.33861 | 46.53759 | 49.1192 | 51.72392 | 52.94957 |
| 265 | 49.2533 | 0.040982 | 0.85168 | 45.47903 | 46.67669 | 49.2533 | 51.85006 | 53.071 |
| 266 | 49.3833 | 0.040768 | 0.872086 | 45.61571 | 46.81194 | 49.3833 | 51.97191 | 53.18805 |
| 267 | 49.509 | 0.040557 | 0.892493 | 45.74829 | 46.94302 | 49.509 | 52.08937 | 53.3007 |
| 268 | 49.6306 | 0.040351 | 0.912899 | 45.87676 | 47.06997 | 49.6306 | 52.20279 | 53.40936 |
| 269 | 49.7485 | 0.040151 | 0.933305 | 46.00138 | 47.19312 | 49.7485 | 52.31267 | 53.51456 |
| 270 | 49.8629 | 0.03996 | 0.953712 | 46.12205 | 47.31246 | 49.8629 | 52.4194 | 53.6168 |
| 271 | 49.974 | 0.039779 | 0.974118 | 46.23885 | 47.42809 | 49.974 | 52.52327 | 53.7164 |
| 272 | 50.0821 | 0.03961 | 0.994525 | 46.35185 | 47.54018 | 50.0821 | 52.62473 | 53.81387 |
| 273 | 50.1874 | 0.039454 | 1.014931 | 46.46113 | 47.64883 | 50.1874 | 52.72405 | 53.90954 |
| 274 | 50.2904 | 0.039314 | 1.035337 | 46.56686 | 47.75433 | 50.2904 | 52.82196 | 54.00421 |
| 275 | 50.3912 | 0.039189 | 1.055744 | 46.6692 | 47.85681 | 50.3912 | 52.9185 | 54.09793 |
| 276 | 50.4904 | 0.03908 | 1.07615 | 46.76859 | 47.95677 | 50.4904 | 53.01438 | 54.19141 |
| 277 | 50.5881 | 0.038988 | 1.096557 | 46.86502 | 48.05424 | 50.5881 | 53.10976 | 54.28488 |
| 278 | 50.6848 | 0.038915 | 1.116963 | 46.95875 | 48.14954 | 50.6848 | 53.20531 | 54.37906 |
| 279 | 50.7808 | 0.03886 | 1.137369 | 47.05011 | 48.24302 | 50.7808 | 53.30127 | 54.47417 |
| 280 | 50.8765 | 0.038824 | 1.157776 | 47.13938 | 48.33498 | 50.8765 | 53.39813 | 54.57075 |
| 281 | 50.9719 | 0.038808 | 1.178182 | 47.22644 | 48.42535 | 50.9719 | 53.49597 | 54.6689 |
| 282 | 51.0666 | 0.03881 | 1.198589 | 47.31108 | 48.51386 | 51.0666 | 53.59424 | 54.768 |
| 283 | 51.1604 | 0.038827 | 1.218995 | 47.39341 | 48.60051 | 51.1604 | 53.69253 | 54.86754 |
| 284 | 51.253 | 0.038858 | 1.239401 | 47.47322 | 48.68508 | 51.253 | 53.79047 | 54.96712 |
| 285 | 51.3441 | 0.038903 | 1.259808 | 47.55023 | 48.76727 | 51.3441 | 53.88775 | 55.06642 |
| 286 | 51.4333 | 0.038958 | 1.280214 | 47.62444 | 48.84696 | 51.4333 | 53.98368 | 55.16463 |
| 287 | 51.5204 | 0.039023 | 1.30062 | 47.69566 | 48.92396 | 51.5204 | 54.07807 | 55.26154 |
| 288 | 51.6054 | 0.039096 | 1.321027 | 47.76408 | 48.9984 | 51.6054 | 54.17077 | 55.35695 |
| 289 | 51.6885 | 0.039176 | 1.341433 | 47.82999 | 49.07053 | 51.6885 | 54.26194 | 55.45098 |
| 290 | 51.7701 | 0.039262 | 1.36184 | 47.89383 | 49.1408 | 51.7701 | 54.35193 | 55.54397 |
| 291 | 51.8504 | 0.039354 | 1.382246 | 47.9558 | 49.20938 | 51.8504 | 54.44095 | 55.63614 |
| 292 | 51.9297 | 0.039451 | 1.402652 | 48.01626 | 49.27664 | 51.9297 | 54.52924 | 55.72771 |
| 293 | 52.0084 | 0.03955 | 1.423059 | 48.07589 | 49.34315 | 52.0084 | 54.61705 | 55.81882 |

**Supplemental Table 5. Length LMS Table for Males**

| GA in days | M | S | L | percentile=3 | percentile=10 | percentile=50 | percentile=90 | percentile=97 |
| --- | --- | --- | --- | --- | --- | --- | --- | --- |
| 245 | 46.6729 | 0.043774 | 0.438326 | 42.91887 | 44.09577 | 46.6729 | 49.33253 | 50.60462 |
| 246 | 46.8512 | 0.043837 | 0.457378 | 43.0746 | 44.25918 | 46.8512 | 49.52345 | 50.80061 |
| 247 | 47.0297 | 0.043894 | 0.47643 | 43.23094 | 44.42309 | 47.0297 | 49.71423 | 50.99628 |
| 248 | 47.2085 | 0.043943 | 0.495482 | 43.38815 | 44.5877 | 47.2085 | 49.90483 | 51.19154 |
| 249 | 47.3873 | 0.043983 | 0.514534 | 43.54606 | 44.75281 | 47.3873 | 50.09488 | 51.38597 |
| 250 | 47.5663 | 0.044011 | 0.533586 | 43.70512 | 44.91878 | 47.5663 | 50.2844 | 51.5795 |
| 251 | 47.7452 | 0.044026 | 0.552638 | 43.86516 | 45.08541 | 47.7452 | 50.47299 | 51.7717 |
| 252 | 47.9241 | 0.044025 | 0.57169 | 44.02654 | 45.25297 | 47.9241 | 50.66058 | 51.9624 |
| 253 | 48.1027 | 0.044007 | 0.590742 | 44.18911 | 45.42126 | 48.1027 | 50.84676 | 52.15117 |
| 254 | 48.2803 | 0.04397 | 0.609794 | 44.35241 | 45.58975 | 48.2803 | 51.03067 | 52.33705 |
| 255 | 48.4566 | 0.043911 | 0.628846 | 44.51647 | 45.75836 | 48.4566 | 51.2118 | 52.51942 |
| 256 | 48.631 | 0.04383 | 0.647898 | 44.68076 | 45.92654 | 48.631 | 51.38949 | 52.69762 |
| 257 | 48.8029 | 0.043724 | 0.66695 | 44.84503 | 46.09393 | 48.8029 | 51.56291 | 52.87071 |
| 258 | 48.9719 | 0.043591 | 0.686002 | 45.00912 | 46.26029 | 48.9719 | 51.7315 | 53.03806 |
| 259 | 49.1373 | 0.043431 | 0.705054 | 45.17244 | 46.42499 | 49.1373 | 51.89452 | 53.19889 |
| 260 | 49.2989 | 0.043243 | 0.724106 | 45.33491 | 46.58791 | 49.2989 | 52.05167 | 53.35289 |
| 261 | 49.4567 | 0.04303 | 0.743158 | 45.4963 | 46.74889 | 49.4567 | 52.20314 | 53.50032 |
| 262 | 49.6105 | 0.042796 | 0.76221 | 45.6561 | 46.90751 | 49.6105 | 52.34898 | 53.64136 |
| 263 | 49.7603 | 0.042543 | 0.781262 | 45.81413 | 47.06366 | 49.7603 | 52.4893 | 53.77618 |
| 264 | 49.9061 | 0.042275 | 0.800314 | 45.97006 | 47.21709 | 49.9061 | 52.62436 | 53.90517 |
| 265 | 50.0479 | 0.041993 | 0.819366 | 46.12379 | 47.36776 | 50.0479 | 52.75423 | 54.02843 |
| 266 | 50.1854 | 0.041702 | 0.838418 | 46.27461 | 47.51505 | 50.1854 | 52.87892 | 54.1461 |
| 267 | 50.3188 | 0.041406 | 0.85747 | 46.42233 | 47.65891 | 50.3188 | 52.99889 | 54.25879 |
| 268 | 50.448 | 0.04111 | 0.876522 | 46.56638 | 47.79893 | 50.448 | 53.11437 | 54.36688 |
| 269 | 50.5729 | 0.040822 | 0.895574 | 46.70592 | 47.93448 | 50.5729 | 53.22578 | 54.47103 |
| 270 | 50.6935 | 0.040547 | 0.914626 | 46.84045 | 48.06524 | 50.6935 | 53.33345 | 54.57174 |
| 271 | 50.8098 | 0.040291 | 0.933678 | 46.96938 | 48.1908 | 50.8098 | 53.43779 | 54.66959 |
| 272 | 50.9217 | 0.040061 | 0.95273 | 47.09192 | 48.31059 | 50.9217 | 53.53916 | 54.76515 |
| 273 | 51.0293 | 0.03986 | 0.971782 | 47.20786 | 48.4245 | 51.0293 | 53.63786 | 54.85884 |
| 274 | 51.1329 | 0.039693 | 0.990834 | 47.31695 | 48.53246 | 51.1329 | 53.73456 | 54.95147 |
| 275 | 51.2332 | 0.039557 | 1.009886 | 47.42009 | 48.6353 | 51.2332 | 53.82979 | 55.04351 |
| 276 | 51.331 | 0.039453 | 1.028938 | 47.51789 | 48.73372 | 51.331 | 53.92448 | 55.13593 |
| 277 | 51.427 | 0.039379 | 1.04799 | 47.61116 | 48.82847 | 51.427 | 54.01924 | 55.22928 |
| 278 | 51.5221 | 0.039335 | 1.067042 | 47.70071 | 48.9204 | 51.5221 | 54.11501 | 55.32456 |
| 279 | 51.617 | 0.039319 | 1.086094 | 47.78736 | 49.0103 | 51.617 | 54.21241 | 55.42231 |
| 280 | 51.7124 | 0.039332 | 1.105146 | 47.87161 | 49.09873 | 51.7124 | 54.31224 | 55.52339 |
| 281 | 51.8086 | 0.039373 | 1.124198 | 47.95383 | 49.18605 | 51.8086 | 54.41476 | 55.62803 |
| 282 | 51.9053 | 0.039438 | 1.14325 | 48.0341 | 49.2722 | 51.9053 | 54.51939 | 55.73553 |
| 283 | 52.0023 | 0.039526 | 1.162302 | 48.11231 | 49.35707 | 52.0023 | 54.62586 | 55.84557 |
| 284 | 52.0992 | 0.039634 | 1.181354 | 48.18837 | 49.44045 | 52.0992 | 54.73356 | 55.95745 |
| 285 | 52.1959 | 0.03976 | 1.200406 | 48.26235 | 49.52237 | 52.1959 | 54.84225 | 56.07085 |
| 286 | 52.2921 | 0.039903 | 1.219459 | 48.33407 | 49.60261 | 52.2921 | 54.95155 | 56.18538 |
| 287 | 52.3875 | 0.04006 | 1.238511 | 48.40353 | 49.68108 | 52.3875 | 55.06096 | 56.3004 |
| 288 | 52.482 | 0.040228 | 1.257563 | 48.47093 | 49.75788 | 52.482 | 55.17016 | 56.41553 |
| 289 | 52.5758 | 0.040407 | 1.276615 | 48.53644 | 49.83319 | 52.5758 | 55.27937 | 56.53099 |
| 290 | 52.6689 | 0.040595 | 1.295667 | 48.60025 | 49.90714 | 52.6689 | 55.38846 | 56.64657 |
| 291 | 52.7614 | 0.04079 | 1.314719 | 48.66265 | 49.97997 | 52.7614 | 55.49741 | 56.76219 |
| 292 | 52.8534 | 0.040991 | 1.333771 | 48.72382 | 50.05182 | 52.8534 | 55.60624 | 56.87786 |
| 293 | 52.945 | 0.041195 | 1.352823 | 48.78416 | 50.123 | 52.945 | 55.71487 | 56.9934 |

**Supplemental Table 6. Head Circumference LMS Table for Females**

| GA in days | M | S | L | percentile=3 | percentile=10 | percentile=50 | percentile=90 | percentile=97 |
| --- | --- | --- | --- | --- | --- | --- | --- | --- |
| 245 | 32.3428 | 0.040639 | 0.960676 | 29.87453 | 30.66011 | 32.3428 | 34.02894 | 34.81851 |
| 246 | 32.2943 | 0.040805 | 0.943583 | 29.82134 | 30.60804 | 32.2943 | 33.98554 | 34.778 |
| 247 | 32.262 | 0.040967 | 0.92672 | 29.78337 | 30.57151 | 32.262 | 33.95901 | 34.75467 |
| 248 | 32.2483 | 0.041125 | 0.910178 | 29.76282 | 30.55277 | 32.2483 | 33.95187 | 34.75112 |
| 249 | 32.2558 | 0.041278 | 0.894046 | 29.76212 | 30.55432 | 32.2558 | 33.96685 | 34.77009 |
| 250 | 32.2869 | 0.041424 | 0.878415 | 29.78358 | 30.57849 | 32.2869 | 34.00637 | 34.81406 |
| 251 | 32.344 | 0.041562 | 0.863376 | 29.82945 | 30.62759 | 32.344 | 34.07296 | 34.88557 |
| 252 | 32.4294 | 0.041691 | 0.849015 | 29.90188 | 30.7038 | 32.4294 | 34.16898 | 34.98705 |
| 253 | 32.5401 | 0.041808 | 0.835379 | 29.99826 | 30.80441 | 32.5401 | 34.29117 | 35.11508 |
| 254 | 32.6676 | 0.04191 | 0.82247 | 30.11094 | 30.92149 | 32.6676 | 34.43044 | 35.26031 |
| 255 | 32.8031 | 0.041993 | 0.810285 | 30.23204 | 31.04688 | 32.8031 | 34.57735 | 35.413 |
| 256 | 32.938 | 0.042053 | 0.798824 | 30.3539 | 31.1726 | 32.938 | 34.72265 | 35.56357 |
| 257 | 33.0633 | 0.042086 | 0.788087 | 30.46846 | 31.29032 | 33.0633 | 34.85667 | 35.70205 |
| 258 | 33.1705 | 0.042089 | 0.778072 | 30.56811 | 31.39213 | 33.1705 | 34.97029 | 35.81904 |
| 259 | 33.2511 | 0.042058 | 0.768779 | 30.64526 | 31.47016 | 33.2511 | 35.05438 | 35.90506 |
| 260 | 33.3046 | 0.041993 | 0.760243 | 30.69945 | 31.52395 | 33.3046 | 35.10838 | 35.95957 |
| 261 | 33.3388 | 0.041898 | 0.752529 | 30.73762 | 31.56069 | 33.3388 | 35.1407 | 35.99123 |
| 262 | 33.3618 | 0.041776 | 0.745707 | 30.76703 | 31.58794 | 33.3618 | 35.15998 | 36.00896 |
| 263 | 33.3817 | 0.041631 | 0.739845 | 30.7949 | 31.61318 | 33.3817 | 35.17495 | 36.02176 |
| 264 | 33.4066 | 0.041467 | 0.735012 | 30.82845 | 31.64391 | 33.4066 | 35.19429 | 36.03861 |
| 265 | 33.4445 | 0.041287 | 0.731276 | 30.87489 | 31.68759 | 33.4445 | 35.22658 | 36.06832 |
| 266 | 33.5034 | 0.041095 | 0.728706 | 30.94136 | 31.75164 | 33.5034 | 35.28037 | 36.11975 |
| 267 | 33.5834 | 0.040895 | 0.727391 | 31.02773 | 31.836 | 33.5834 | 35.35595 | 36.19324 |
| 268 | 33.6776 | 0.04069 | 0.727435 | 31.12747 | 31.93402 | 33.6776 | 35.44615 | 36.28151 |
| 269 | 33.7785 | 0.040483 | 0.728946 | 31.23345 | 32.03846 | 33.7785 | 35.54319 | 36.37664 |
| 270 | 33.8786 | 0.040278 | 0.732031 | 31.3385 | 32.14204 | 33.8786 | 35.63936 | 36.47081 |
| 271 | 33.9706 | 0.040078 | 0.736796 | 31.43566 | 32.23769 | 33.9706 | 35.7271 | 36.55636 |
| 272 | 34.0469 | 0.039886 | 0.743349 | 31.51769 | 32.31807 | 34.0469 | 35.79856 | 36.6253 |
| 273 | 34.1005 | 0.039705 | 0.751793 | 31.57788 | 32.37638 | 34.1005 | 35.84654 | 36.67033 |
| 274 | 34.1307 | 0.039534 | 0.762177 | 31.61564 | 32.41198 | 34.1307 | 35.87025 | 36.69065 |
| 275 | 34.1432 | 0.039371 | 0.774498 | 31.63634 | 32.43036 | 34.1432 | 35.87564 | 36.69229 |
| 276 | 34.1442 | 0.039209 | 0.788746 | 31.64617 | 32.43771 | 34.1442 | 35.86891 | 36.68147 |
| 277 | 34.1398 | 0.039045 | 0.804914 | 31.65096 | 32.43993 | 34.1398 | 35.85635 | 36.66457 |
| 278 | 34.136 | 0.038876 | 0.822995 | 31.65647 | 32.44287 | 34.136 | 35.84413 | 36.64785 |
| 279 | 34.1388 | 0.038696 | 0.84298 | 31.66865 | 32.45249 | 34.1388 | 35.83829 | 36.63736 |
| 280 | 34.1542 | 0.038503 | 0.864859 | 31.6932 | 32.4746 | 34.1542 | 35.84504 | 36.63941 |
| 281 | 34.1838 | 0.038295 | 0.888542 | 31.73178 | 32.51081 | 34.1838 | 35.86597 | 36.65559 |
| 282 | 34.2249 | 0.038073 | 0.913865 | 31.78185 | 32.55854 | 34.2249 | 35.89828 | 36.68307 |
| 283 | 34.2749 | 0.037839 | 0.94066 | 31.84091 | 32.61525 | 34.2749 | 35.93934 | 36.7192 |
| 284 | 34.3309 | 0.037595 | 0.968759 | 31.90616 | 32.6781 | 34.3309 | 35.98619 | 36.76101 |
| 285 | 34.3901 | 0.037342 | 0.997993 | 31.97497 | 32.74442 | 34.3901 | 36.03594 | 36.80557 |
| 286 | 34.4498 | 0.03708 | 1.028195 | 32.04485 | 32.81163 | 34.4498 | 36.08577 | 36.85002 |
| 287 | 34.5072 | 0.036813 | 1.059199 | 32.11297 | 32.87691 | 34.5072 | 36.13294 | 36.89162 |
| 288 | 34.5604 | 0.03654 | 1.090874 | 32.17764 | 32.9385 | 34.5604 | 36.17541 | 36.92831 |
| 289 | 34.6081 | 0.036264 | 1.123127 | 32.23745 | 32.99502 | 34.6081 | 36.21197 | 36.95891 |
| 290 | 34.6489 | 0.035984 | 1.155866 | 32.29116 | 33.04519 | 34.6489 | 36.24112 | 36.98187 |
| 291 | 34.6817 | 0.035703 | 1.188997 | 32.33757 | 33.08782 | 34.6817 | 36.26185 | 36.99623 |
| 292 | 34.7051 | 0.035421 | 1.222429 | 32.37536 | 33.12157 | 34.7051 | 36.27271 | 37.00054 |
| 293 | 34.7179 | 0.035139 | 1.256069 | 32.40333 | 33.14524 | 34.7179 | 36.27252 | 36.99358 |

**Supplemental Table 7. Head Circumference LMS Table for Males**

| GA in days | M | S | L | percentile=3 | percentile=10 | percentile=50 | percentile=90 | percentile=97 |
| --- | --- | --- | --- | --- | --- | --- | --- | --- |
| 245 | 32.6222 | 0.041107 | 0.632832 | 30.1361 | 30.92034 | 32.6222 | 34.35731 | 35.1799 |
| 246 | 32.6223 | 0.041345 | 0.636436 | 30.12166 | 30.91051 | 32.6223 | 34.36739 | 35.19467 |
| 247 | 32.6308 | 0.041578 | 0.640039 | 30.11526 | 30.90885 | 32.6308 | 34.3861 | 35.21817 |
| 248 | 32.6513 | 0.041804 | 0.643642 | 30.12034 | 30.91882 | 32.6513 | 34.41717 | 35.2542 |
| 249 | 32.6871 | 0.04202 | 0.647246 | 30.1401 | 30.94368 | 32.6871 | 34.46396 | 35.30613 |
| 250 | 32.742 | 0.042223 | 0.650849 | 30.17821 | 30.98713 | 32.742 | 34.53035 | 35.3779 |
| 251 | 32.8193 | 0.04241 | 0.654452 | 30.23787 | 31.0524 | 32.8193 | 34.61971 | 35.4729 |
| 252 | 32.9222 | 0.04258 | 0.658055 | 30.32206 | 31.14254 | 32.9222 | 34.73538 | 35.59455 |
| 253 | 33.0483 | 0.042728 | 0.661659 | 30.42888 | 31.2555 | 33.0483 | 34.87463 | 35.73995 |
| 254 | 33.1887 | 0.042855 | 0.665262 | 30.55006 | 31.3828 | 33.1887 | 35.02811 | 35.89953 |
| 255 | 33.3342 | 0.042957 | 0.668865 | 30.67738 | 31.51593 | 33.3342 | 35.18593 | 36.06308 |
| 256 | 33.4759 | 0.043034 | 0.672469 | 30.80268 | 31.64648 | 33.4759 | 35.33868 | 36.22096 |
| 257 | 33.6046 | 0.043082 | 0.676072 | 30.91776 | 31.76593 | 33.6046 | 35.47646 | 36.36293 |
| 258 | 33.7113 | 0.043102 | 0.679675 | 31.0143 | 31.86576 | 33.7113 | 35.58979 | 36.47928 |
| 259 | 33.7873 | 0.04309 | 0.683279 | 31.08456 | 31.93792 | 33.7873 | 35.66931 | 36.56034 |
| 260 | 33.8327 | 0.043047 | 0.686882 | 31.1286 | 31.98249 | 33.8327 | 35.71516 | 36.60626 |
| 261 | 33.8564 | 0.042975 | 0.690485 | 31.15447 | 32.00778 | 33.8564 | 35.73681 | 36.6268 |
| 262 | 33.8679 | 0.042875 | 0.694089 | 31.17087 | 32.02273 | 33.8679 | 35.74435 | 36.63232 |
| 263 | 33.8768 | 0.042751 | 0.697692 | 31.18637 | 32.03625 | 33.8768 | 35.74809 | 36.63345 |
| 264 | 33.8924 | 0.042604 | 0.701295 | 31.20948 | 32.0571 | 33.8924 | 35.75788 | 36.64033 |
| 265 | 33.9243 | 0.042436 | 0.704899 | 31.24893 | 32.09428 | 33.9243 | 35.78393 | 36.66346 |
| 266 | 33.9814 | 0.04225 | 0.708502 | 31.31275 | 32.15609 | 33.9814 | 35.83575 | 36.71262 |
| 267 | 34.0643 | 0.042047 | 0.712105 | 31.40145 | 32.24308 | 34.0643 | 35.914 | 36.78849 |
| 268 | 34.1648 | 0.041833 | 0.715709 | 31.50715 | 32.34725 | 34.1648 | 36.01027 | 36.88259 |
| 269 | 34.2744 | 0.04161 | 0.719312 | 31.6219 | 32.46049 | 34.2744 | 36.11567 | 36.98584 |
| 270 | 34.3845 | 0.041383 | 0.722915 | 31.73746 | 32.57444 | 34.3845 | 36.22136 | 37.08928 |
| 271 | 34.4865 | 0.041154 | 0.726519 | 31.84576 | 32.68087 | 34.4865 | 36.31837 | 37.18376 |
| 272 | 34.5721 | 0.040929 | 0.730122 | 31.93875 | 32.77164 | 34.5721 | 36.39823 | 37.26075 |
| 273 | 34.6328 | 0.040709 | 0.733726 | 32.00849 | 32.83864 | 34.6328 | 36.45207 | 37.31118 |
| 274 | 34.6677 | 0.040498 | 0.737329 | 32.05386 | 32.8808 | 34.6677 | 36.47913 | 37.33439 |
| 275 | 34.6831 | 0.040297 | 0.740932 | 32.08058 | 32.90405 | 34.6831 | 36.48611 | 37.33724 |
| 276 | 34.6854 | 0.040109 | 0.744536 | 32.09438 | 32.91432 | 34.6854 | 36.4799 | 37.32686 |
| 277 | 34.6811 | 0.039934 | 0.748139 | 32.10124 | 32.91775 | 34.6811 | 36.46733 | 37.31025 |
| 278 | 34.6769 | 0.039775 | 0.751743 | 32.10717 | 32.92057 | 34.6769 | 36.4556 | 37.29482 |
| 279 | 34.6791 | 0.039633 | 0.755346 | 32.11795 | 32.92873 | 34.6791 | 36.45136 | 37.28741 |
| 280 | 34.6942 | 0.03951 | 0.758949 | 32.13946 | 32.94831 | 34.6942 | 36.46154 | 37.29513 |
| 281 | 34.724 | 0.039407 | 0.762553 | 32.17333 | 32.98097 | 34.724 | 36.48806 | 37.31998 |
| 282 | 34.7666 | 0.039321 | 0.766156 | 32.21798 | 33.02506 | 34.7666 | 36.52879 | 37.3597 |
| 283 | 34.8193 | 0.039254 | 0.76976 | 32.27078 | 33.07792 | 34.8193 | 36.58097 | 37.41153 |
| 284 | 34.88 | 0.039203 | 0.773363 | 32.32999 | 33.13768 | 34.88 | 36.64228 | 37.473 |
| 285 | 34.9461 | 0.039168 | 0.776966 | 32.39317 | 33.20186 | 34.9461 | 36.70998 | 37.54134 |
| 286 | 35.0154 | 0.039149 | 0.78057 | 32.4583 | 33.26839 | 35.0154 | 36.78175 | 37.61417 |
| 287 | 35.0854 | 0.039144 | 0.784173 | 32.52317 | 33.33496 | 35.0854 | 36.8549 | 37.68869 |
| 288 | 35.1544 | 0.039152 | 0.787777 | 32.58626 | 33.4 | 35.1544 | 36.92759 | 37.76301 |
| 289 | 35.2212 | 0.039171 | 0.79138 | 32.6466 | 33.46246 | 35.2212 | 36.99846 | 37.8357 |
| 290 | 35.2844 | 0.0392 | 0.794983 | 32.70294 | 33.52104 | 35.2844 | 37.06602 | 37.9052 |
| 291 | 35.3429 | 0.039236 | 0.798587 | 32.75445 | 33.57485 | 35.3429 | 37.12896 | 37.97013 |
| 292 | 35.3955 | 0.039277 | 0.80219 | 32.80016 | 33.62281 | 35.3955 | 37.18593 | 38.02906 |
| 293 | 35.4408 | 0.039321 | 0.805794 | 32.8389 | 33.6637 | 35.4408 | 37.23538 | 38.08036 |

**Supplemental Table 8. Body Mass Index LMS Table for Females**

| GA in days | M | S | L | percentile=3 | percentile=10 | percentile=50 | percentile=90 | percentile=97 |
| --- | --- | --- | --- | --- | --- | --- | --- | --- |
| 245 | 11.5868 | 0.091669 | -0.28136 | 9.791428 | 10.32211 | 11.5868 | 13.05708 | 13.82667 |
| 246 | 11.5638 | 0.092961 | -0.27693 | 9.748759 | 10.28481 | 11.5638 | 13.05307 | 13.83352 |
| 247 | 11.5475 | 0.094245 | -0.27251 | 9.711994 | 10.25365 | 11.5475 | 13.05644 | 13.84811 |
| 248 | 11.5393 | 0.095508 | -0.26809 | 9.682488 | 10.23001 | 11.5393 | 13.06857 | 13.87181 |
| 249 | 11.5408 | 0.096734 | -0.26366 | 9.661809 | 10.21546 | 11.5408 | 13.09106 | 13.90619 |
| 250 | 11.5535 | 0.09791 | -0.25924 | 9.651374 | 10.21145 | 11.5535 | 13.12543 | 13.95276 |
| 251 | 11.5788 | 0.099018 | -0.25481 | 9.652599 | 10.2194 | 11.5788 | 13.173 | 14.01281 |
| 252 | 11.6183 | 0.100042 | -0.25039 | 9.667028 | 10.24088 | 11.6183 | 13.23538 | 14.0879 |
| 253 | 11.671 | 0.100967 | -0.24597 | 9.694033 | 10.27516 | 11.671 | 13.31119 | 14.17647 |
| 254 | 11.7338 | 0.101779 | -0.24154 | 9.731246 | 10.31966 | 11.7338 | 13.39669 | 14.27437 |
| 255 | 11.8033 | 0.102463 | -0.23712 | 9.776101 | 10.37159 | 11.8033 | 13.4877 | 14.37704 |
| 256 | 11.8763 | 0.103006 | -0.23269 | 9.826194 | 10.42831 | 11.8763 | 13.58033 | 14.48018 |
| 257 | 11.9495 | 0.103394 | -0.22827 | 9.879078 | 10.48713 | 11.9495 | 13.67049 | 14.57927 |
| 258 | 12.0194 | 0.103613 | -0.22385 | 9.932161 | 10.54521 | 12.0194 | 13.75388 | 14.66956 |
| 259 | 12.0831 | 0.103653 | -0.21942 | 9.983286 | 10.60017 | 12.0831 | 13.82694 | 14.74715 |
| 260 | 12.1399 | 0.103516 | -0.215 | 10.0319 | 10.65142 | 12.1399 | 13.88886 | 14.81117 |
| 261 | 12.1925 | 0.103224 | -0.21057 | 10.07988 | 10.70106 | 12.1925 | 13.94311 | 14.86551 |
| 262 | 12.2432 | 0.102798 | -0.20615 | 10.1288 | 10.75087 | 12.2432 | 13.99267 | 14.91356 |
| 263 | 12.2948 | 0.10226 | -0.20173 | 10.1806 | 10.80304 | 12.2948 | 14.04114 | 14.95935 |
| 264 | 12.3496 | 0.101632 | -0.1973 | 10.23682 | 10.85931 | 12.3496 | 14.09152 | 15.0063 |
| 265 | 12.4104 | 0.100934 | -0.19288 | 10.29946 | 10.9219 | 12.4104 | 14.14736 | 15.05836 |
| 266 | 12.4794 | 0.100189 | -0.18846 | 10.36996 | 10.99247 | 12.4794 | 14.21156 | 15.11883 |
| 267 | 12.5561 | 0.099412 | -0.18403 | 10.44766 | 11.07041 | 12.5561 | 14.28379 | 15.1875 |
| 268 | 12.6369 | 0.098615 | -0.17961 | 10.52938 | 11.15239 | 12.6369 | 14.36016 | 15.26031 |
| 269 | 12.7179 | 0.097809 | -0.17518 | 10.61167 | 11.23484 | 12.7179 | 14.43642 | 15.33286 |
| 270 | 12.7953 | 0.097005 | -0.17076 | 10.69115 | 11.31424 | 12.7953 | 14.50848 | 15.40091 |
| 271 | 12.8654 | 0.096213 | -0.16634 | 10.76451 | 11.38717 | 12.8654 | 14.57234 | 15.46033 |
| 272 | 12.9243 | 0.095444 | -0.16191 | 10.82825 | 11.44998 | 12.9243 | 14.62384 | 15.50682 |
| 273 | 12.9683 | 0.094707 | -0.15749 | 10.87902 | 11.49925 | 12.9683 | 14.659 | 15.53629 |
| 274 | 12.9973 | 0.094014 | -0.15306 | 10.91645 | 11.53465 | 12.9973 | 14.67801 | 15.54905 |
| 275 | 13.0144 | 0.09338 | -0.14864 | 10.94279 | 11.55868 | 13.0144 | 14.68468 | 15.54934 |
| 276 | 13.023 | 0.092816 | -0.14422 | 10.96064 | 11.57419 | 13.023 | 14.68311 | 15.54159 |
| 277 | 13.0262 | 0.092337 | -0.13979 | 10.97226 | 11.58367 | 13.0262 | 14.67708 | 15.52998 |
| 278 | 13.0275 | 0.091956 | -0.13537 | 10.98033 | 11.59004 | 13.0275 | 14.6708 | 15.51907 |
| 279 | 13.0301 | 0.091687 | -0.13094 | 10.98725 | 11.59594 | 13.0301 | 14.66813 | 15.51307 |
| 280 | 13.0372 | 0.091541 | -0.12652 | 10.99549 | 11.60405 | 13.0372 | 14.67288 | 15.51612 |
| 281 | 13.0502 | 0.091521 | -0.1221 | 11.00616 | 11.61557 | 13.0502 | 14.68667 | 15.52995 |
| 282 | 13.0682 | 0.091617 | -0.11767 | 11.01869 | 11.62983 | 13.0682 | 14.70831 | 15.55318 |
| 283 | 13.0906 | 0.09182 | -0.11325 | 11.03274 | 11.64643 | 13.0906 | 14.73694 | 15.58486 |
| 284 | 13.1166 | 0.09212 | -0.10883 | 11.04782 | 11.66478 | 13.1166 | 14.77151 | 15.62374 |
| 285 | 13.1455 | 0.092507 | -0.1044 | 11.06353 | 11.6844 | 13.1455 | 14.81102 | 15.66871 |
| 286 | 13.1764 | 0.092974 | -0.09998 | 11.07924 | 11.70458 | 13.1764 | 14.85436 | 15.71851 |
| 287 | 13.2086 | 0.09351 | -0.09555 | 11.09458 | 11.72486 | 13.2086 | 14.90054 | 15.77199 |
| 288 | 13.2415 | 0.094107 | -0.09113 | 11.10919 | 11.7448 | 13.2415 | 14.94873 | 15.82822 |
| 289 | 13.2748 | 0.094756 | -0.08671 | 11.12299 | 11.76428 | 13.2748 | 14.99844 | 15.88659 |
| 290 | 13.3081 | 0.095446 | -0.08228 | 11.13587 | 11.78309 | 13.3081 | 15.049 | 15.94629 |
| 291 | 13.341 | 0.096169 | -0.07786 | 11.14766 | 11.801 | 13.341 | 15.09982 | 16.00661 |
| 292 | 13.3731 | 0.096914 | -0.07343 | 11.15825 | 11.81781 | 13.3731 | 15.15022 | 16.06674 |
| 293 | 13.404 | 0.097671 | -0.06901 | 11.16751 | 11.83333 | 13.404 | 15.19957 | 16.1259 |

**Supplemental Table 9. Body Mass Index LMS Table for Males**

| GA in days | M | S | L | percentile=3 | percentile=10 | percentile=50 | percentile=90 | percentile=97 |
| --- | --- | --- | --- | --- | --- | --- | --- | --- |
| 245 | 11.4511 | 0.104488 | -0.22391 | 9.447653 | 10.03568 | 11.4511 | 13.11873 | 14.00005 |
| 246 | 11.4889 | 0.104126 | -0.21768 | 9.483953 | 10.07281 | 11.4889 | 13.15498 | 14.03449 |
| 247 | 11.5275 | 0.103765 | -0.21145 | 9.520947 | 10.11066 | 11.5275 | 13.19214 | 14.06989 |
| 248 | 11.5674 | 0.103405 | -0.20522 | 9.559049 | 10.14968 | 11.5674 | 13.23077 | 14.10687 |
| 249 | 11.6089 | 0.103046 | -0.199 | 9.598508 | 10.19012 | 11.6089 | 13.27121 | 14.14578 |
| 250 | 11.6527 | 0.102687 | -0.19277 | 9.639924 | 10.23262 | 11.6527 | 13.31425 | 14.18745 |
| 251 | 11.6992 | 0.102329 | -0.18654 | 9.683612 | 10.27752 | 11.6992 | 13.36035 | 14.23238 |
| 252 | 11.7488 | 0.101971 | -0.18031 | 9.729926 | 10.32518 | 11.7488 | 13.40994 | 14.28103 |
| 253 | 11.8014 | 0.101613 | -0.17408 | 9.778786 | 10.37553 | 11.8014 | 13.46292 | 14.33326 |
| 254 | 11.8566 | 0.101256 | -0.16785 | 9.829849 | 10.42819 | 11.8566 | 13.51883 | 14.38861 |
| 255 | 11.9137 | 0.100899 | -0.16163 | 9.882553 | 10.48258 | 11.9137 | 13.57686 | 14.44619 |
| 256 | 11.9721 | 0.100542 | -0.1554 | 9.936405 | 10.53815 | 11.9721 | 13.63631 | 14.50527 |
| 257 | 12.0311 | 0.100186 | -0.14917 | 9.990807 | 10.59429 | 12.0311 | 13.69641 | 14.56502 |
| 258 | 12.0903 | 0.099829 | -0.14294 | 10.04546 | 10.65067 | 12.0903 | 13.75667 | 14.62492 |
| 259 | 12.1491 | 0.099473 | -0.13671 | 10.09984 | 10.70674 | 12.1491 | 13.81643 | 14.68428 |
| 260 | 12.2073 | 0.099117 | -0.13048 | 10.15379 | 10.76233 | 12.2073 | 13.87546 | 14.74284 |
| 261 | 12.2657 | 0.098761 | -0.12426 | 10.20797 | 10.81814 | 12.2657 | 13.93467 | 14.80157 |
| 262 | 12.3248 | 0.098407 | -0.11803 | 10.26277 | 10.87459 | 12.3248 | 13.99465 | 14.86112 |
| 263 | 12.3852 | 0.098054 | -0.1118 | 10.31871 | 10.93223 | 12.3852 | 14.05607 | 14.92219 |
| 264 | 12.4476 | 0.097702 | -0.10557 | 10.37636 | 10.99167 | 12.4476 | 14.11973 | 14.98562 |
| 265 | 12.5126 | 0.097353 | -0.09934 | 10.4362 | 11.05342 | 12.5126 | 14.18633 | 15.05218 |
| 266 | 12.5808 | 0.097005 | -0.09312 | 10.49877 | 11.11804 | 12.5808 | 14.25651 | 15.12253 |
| 267 | 12.6513 | 0.096661 | -0.08689 | 10.56326 | 11.18469 | 12.6513 | 14.32932 | 15.19567 |
| 268 | 12.7219 | 0.096319 | -0.08066 | 10.62787 | 11.25146 | 12.7219 | 14.4022 | 15.26889 |
| 269 | 12.7906 | 0.09598 | -0.07443 | 10.69091 | 11.31656 | 12.7906 | 14.47294 | 15.33983 |
| 270 | 12.855 | 0.095644 | -0.0682 | 10.75038 | 11.37786 | 12.855 | 14.5388 | 15.40562 |
| 271 | 12.913 | 0.095312 | -0.06197 | 10.80448 | 11.4335 | 12.913 | 14.59744 | 15.46377 |
| 272 | 12.9623 | 0.094982 | -0.05575 | 10.85133 | 11.48144 | 12.9623 | 14.64625 | 15.51151 |
| 273 | 13.0008 | 0.094657 | -0.04952 | 10.88908 | 11.51978 | 13.0008 | 14.68291 | 15.54642 |
| 274 | 13.0285 | 0.094335 | -0.04329 | 10.91778 | 11.54854 | 13.0285 | 14.70742 | 15.56849 |
| 275 | 13.0476 | 0.094017 | -0.03706 | 10.93922 | 11.56964 | 13.0476 | 14.72228 | 15.58038 |
| 276 | 13.0603 | 0.093702 | -0.03083 | 10.95526 | 11.58504 | 13.0603 | 14.72997 | 15.58473 |
| 277 | 13.0689 | 0.09339 | -0.0246 | 10.96783 | 11.59678 | 13.0689 | 14.73309 | 15.58429 |
| 278 | 13.0755 | 0.093081 | -0.01838 | 10.97868 | 11.6067 | 13.0755 | 14.73402 | 15.58157 |
| 279 | 13.0823 | 0.092774 | -0.01215 | 10.98967 | 11.61679 | 13.0823 | 14.73522 | 15.57916 |
| 280 | 13.0917 | 0.09247 | -0.00592 | 11.00281 | 11.62915 | 13.0917 | 14.73941 | 15.57995 |
| 281 | 13.1044 | 0.092169 | 0.000308 | 11.01869 | 11.64441 | 13.1044 | 14.74738 | 15.58477 |
| 282 | 13.1203 | 0.09187 | 0.006537 | 11.03723 | 11.66251 | 13.1203 | 14.75898 | 15.59346 |
| 283 | 13.1391 | 0.091573 | 0.012765 | 11.05821 | 11.68317 | 13.1391 | 14.77387 | 15.60566 |
| 284 | 13.1605 | 0.091278 | 0.018993 | 11.08136 | 11.70613 | 13.1605 | 14.79172 | 15.62099 |
| 285 | 13.1842 | 0.090985 | 0.025221 | 11.10644 | 11.73112 | 13.1842 | 14.81218 | 15.63911 |
| 286 | 13.21 | 0.090694 | 0.031449 | 11.13327 | 11.75798 | 13.21 | 14.83503 | 15.65977 |
| 287 | 13.2375 | 0.090404 | 0.037677 | 11.16156 | 11.78636 | 13.2375 | 14.85979 | 15.68246 |
| 288 | 13.2665 | 0.090115 | 0.043905 | 11.19112 | 11.81608 | 13.2665 | 14.88624 | 15.70693 |
| 289 | 13.2971 | 0.089828 | 0.050133 | 11.22203 | 11.84722 | 13.2971 | 14.91451 | 15.73335 |
| 290 | 13.329 | 0.089542 | 0.056362 | 11.25405 | 11.87953 | 13.329 | 14.94423 | 15.76131 |
| 291 | 13.3622 | 0.089258 | 0.06259 | 11.28716 | 11.91299 | 13.3622 | 14.97543 | 15.79084 |
| 292 | 13.3966 | 0.088974 | 0.068818 | 11.32133 | 11.94755 | 13.3966 | 15.00796 | 15.82176 |
| 293 | 13.4321 | 0.088692 | 0.075046 | 11.35642 | 11.98309 | 13.4321 | 15.04174 | 15.85402 |
